# Supplementary material for: Cerebrospinal fluid inflammatory biomarkers predicting interferon-beta response in MS patients
Source: PubMed Central journal article supplement — Ther Adv Neurol Disord. 2020 Dec 8;13:1756286420970833. doi: 10.1177/1756286420970833 (PMC7727083; doi:10.1177/1756286420970833), 2020-12-08
Supplement: sj-pdf-1-tan-10.1177_1756286420970833.pdf [file sj-pdf-1-tan-10.1177_1756286420970833.pdf]

Supplementary Table. CSF detectability of the molecules examined in CIS and RR-MS patients, separated in three groups, according to DMTs (IFN-beta, glatiramer acetate, dimethyl fumarate)

| CSF molecules  | IFN-beta (n=116) | Glatiramer acetate (n=51) | Dimethyl fumarate (n=59) |
|----------------|------------------|---------------------------|--------------------------|
| IL-1 $\beta$   | 52.9 %           | 60.7 %                    | 57.4 %                   |
| IL-1ra         | 53.3 %           | 87.5 %                    | 87.2 %                   |
| IL-2           | 51.9 %           | 46.7 %                    | 50.0 %                   |
| IL-4           | 56.9 %           | 72.3 %                    | 73.2 %                   |
| IL-5           | 55.6 %           | 74.4 %                    | 70.0 %                   |
| IL-6           | 97.4 %           | 89.8 %                    | 75.0 %                   |
| IL-7           | 82.6 %           | 76.1 %                    | 60.4 %                   |
| IL-8           | 100 %            | 100 %                     | 100 %                    |
| IL-9           | 97.3 %           | 90.6 %                    | 91.5 %                   |
| IL-10          | 71.1 %           | 93.9 %                    | 94.6 %                   |
| IL-12          | 78.0 %           | 76.1 %                    | 60.0 %                   |
| IL-13          | 95.3 %           | 97.7 %                    | 100 %                    |
| IL-15          | 61.3 %           | 40.6 %                    | 31.9 %                   |
| IL-17          | 40.6 %           | 55.0 %                    | 61.7 %                   |
| TNF $\alpha$   | 73.6 %           | 82.6 %                    | 88.9 %                   |
| IFN $\gamma$   | 68.9 %           | 66.7 %                    | 85.7 %                   |
| MIP-1 $\alpha$ | 43.6 %           | 96.6 %                    | 100 %                    |
| MIP-1 $\beta$  | 93.9 %           | 97.9 %                    | 100 %                    |
| MCP-1          | 100 %            | 100 %                     | 100 %                    |
| IP-10          | 89.3 %           | 96.8 %                    | 100 %                    |
| Eotaxin        | 65.3 %           | 83.9 %                    | 93.6 %                   |
| GM-CSF         | 59.6 %           | 53.2 %                    | 39.3 %                   |
| G-CSF          | 97.4 %           | 97.9 %                    | 98.2 %                   |
| PDGF           | 56.0 %           | 38.7 %                    | 38.3 %                   |
| FGF            | 28.0 %           | 45.2 %                    | 51.1 %                   |
| VEGF           | 69.4 %           | 70.0 %                    | 58.3 %                   |
| RANTES         | 69.3 %           | 77.4 %                    | 80.9 %                   |

Abbreviations:

CIS, clinically isolated syndrome; CSF, cerebrospinal fluid; DMT, disease modifying therapy; FGF, fibroblast growth factor; G-CSF, granulocyte colony-stimulating factor; GM-CSF, granulocyte-macrophage colony-stimulating factor; IFN, interferon; IL, interleukin; MCP, monocyte chemoattractant protein; IP-10, interferon gamma-induced protein 10; MIP, macrophage inflammatory protein; PDGF, platelet-derived growth factor; ra, receptor antagonist;

RANTES, Regulated on Activation Normal T Cell Expressed and Secreted; RR-MS, relapsing-remitting multiple sclerosis; TNF, tumor necrosis factor; VEGF, vascular-endothelial growth factor;
